# Supplementary material for: The Psychiatric Presentation of Mitochondrial Disorders in Adults
Source: Atypon-hosted journal article supplement (doi:10.1176/appi.neuropsych.11110345), 2012-10-01
Supplement: 394_ds001.pdf [file 394_ds001.pdf]

**Data Supplement: Detailed Descriptions of the 47 Cases in the Literature on Patients With Psychiatric Symptoms and Mitochondrial Disorders**

| Reference                                     | Diagnosis               | Sex | Age at Onset, years | Age at Psychiatric Diagnosis | Age at Physical Diagnosis | Psychiatric Symptoms                                                                                                                                                                                                                           | Medical History                                                                                               | Family History             | Investigations                                                                                                                                    |
|-----------------------------------------------|-------------------------|-----|---------------------|------------------------------|---------------------------|------------------------------------------------------------------------------------------------------------------------------------------------------------------------------------------------------------------------------------------------|---------------------------------------------------------------------------------------------------------------|----------------------------|---------------------------------------------------------------------------------------------------------------------------------------------------|
| Ahn <i>et al.</i> , 2005 <sup>13</sup>        | Mitochondrial cytopathy | F   | 16                  | 5                            | NR                        | Low IQ; developmental delay; mood lability, impulsivity, depression, self-harm. After treatment with risperidone, developed paranoid ideation, psychomotor retardation, depression, and fatigue. Resolved with discontinuation of risperidone. | Seizures                                                                                                      | Family history of seizures | MRI : normal; Blood work: lactate elevated; Muscle biopsy: RRFs                                                                                   |
| Amemiya <i>et al.</i> , 2000 <sup>14</sup>    | C3256T                  | M   | 29                  | NR                           | 36                        | Delusions, confusion, progressive dementia                                                                                                                                                                                                     | Myoclonus, muscle atrophy, seizures, ataxia, ophthalmoplegia, paralytic ileus. Died of cardiac failure age 46 | None                       | MRI: progressive brain atrophy; Blood work: lactate and pyruvate elevated; CSF lactate elevated; Muscle biopsy: RRFs, reduced COX activity        |
| Apostolova <i>et al.</i> , 2005 <sup>15</sup> | MELAS A3243G            | F   | 58                  | 58                           | 58                        | Psychosis (paranoia and hallucinations), agitation, cognitive deterioration                                                                                                                                                                    | CAD, cardiomyopathy, chronic fatigue, muscle weakness                                                         | Parents and brother: CAD   | MRI : hyperintensities in a watershed distribution and bilaterally in the cerebellum; Blood work: normal lactate; Muscle biopsy: RRFs, COX–fibers |

|                                         |                 |   |    |    |    |                                                                                                                                                   |                                                                                                                                                           |                                                                                                                                                                                                                                                                                                        |                                                                                                                                                                 |
|-----------------------------------------|-----------------|---|----|----|----|---------------------------------------------------------------------------------------------------------------------------------------------------|-----------------------------------------------------------------------------------------------------------------------------------------------------------|--------------------------------------------------------------------------------------------------------------------------------------------------------------------------------------------------------------------------------------------------------------------------------------------------------|-----------------------------------------------------------------------------------------------------------------------------------------------------------------|
| Ban et al., 1992 <sup>16</sup>          | MELAS<br>A3243G | M | 25 | 19 | 37 | Psychosis (auditory hallucinations, delusions) diagnosed with schizophrenia; later, developed euphoria, progressive dementia, and akinetic mutism | Gastroparesis, weakness of extremities, dysarthria, myoclonus, rigidity, cardiac hypertrophy, bilateral sensorineural hearing loss, died of heart failure | Mother: heart disease from age 30; suicide at age 58                                                                                                                                                                                                                                                   | MRI: ischemia in parieto-occipital regions; Blood work: lactate and pyruvate elevated; Muscle biopsy: RRFs                                                      |
| Bhuvaneshwar et al., 2008 <sup>55</sup> | MELAS           | F | NR | 28 | 28 | History of depression, psychosis (paranoid delusions)                                                                                             | Headaches, progressive decline in functioning, seizures, fatigue, ptosis                                                                                  | NR                                                                                                                                                                                                                                                                                                     | MRI: focal posterior cerebral lesions with T2 hyperintensities and symmetrical basal ganglia calcifications associated with a stroke-like-episode that resolved |
| Clark et al., 1996 <sup>17</sup>        | MELAS<br>A3243G | F | 44 | 27 | 44 | Psychosis (paranoid delusions), suicidal ideation, anxiety, cognitive deterioration                                                               | Weakness upper and lower extremities, bilateral sensorineural hearing loss, stroke, simple partial seizures, WPW, bowel symptoms                          | Mother: bilateral hearing loss; stroke in 40s; seizures; severe psychiatric illness; bowel obstruction. Maternal grandmother: bizarre behavior; died of stroke at 64. Maternal great-aunt: psychosis, episodes of unconsciousness; died at 45. Maternal aunt: depression. Maternal cousin: psychiatric | MRI: cortical hyperintensities; atrophy<br>Blood work: lactate and pyruvate elevated; Muscle biopsy: RRFs, COX+ fibers                                          |

|                                      |                         |   |       |       |    |                                                                                                                                                                                      |                                                                                                                                |                                                                                                                                                                                                                                 |                                                                                                                   |
|--------------------------------------|-------------------------|---|-------|-------|----|--------------------------------------------------------------------------------------------------------------------------------------------------------------------------------------|--------------------------------------------------------------------------------------------------------------------------------|---------------------------------------------------------------------------------------------------------------------------------------------------------------------------------------------------------------------------------|-------------------------------------------------------------------------------------------------------------------|
|                                      |                         |   |       |       |    |                                                                                                                                                                                      |                                                                                                                                | problems; died at an early age                                                                                                                                                                                                  |                                                                                                                   |
| Campos et al., 2001 <sup>18</sup>    | C3303T                  | F | Teens | Teens | 33 | Psychosis; recurrent episodes of depression                                                                                                                                          | Fatigue, weakness, migraine                                                                                                    | Maternal aunt: psychosis, bipolar disorder; maternal grandmother: psychosis; maternal great-uncle: psychosis                                                                                                                    | Not reported                                                                                                      |
| Desnuelle et al., 1989 <sup>19</sup> | KSS                     | F | 24    | 18    | 46 | Psychosis (auditory hallucinations) treated with neuroleptics and several psychiatric admissions; improvement in physical and psychiatric manifestations with coenzyme Q10 treatment | Ptosis, ophthalmoplegia, amenorrhea, amyotrophy with exercise intolerance, eventual respiratory failure requiring tracheostomy | Parental consanguinity; ptosis and ophthalmoplegia in a deceased maternal uncle; brother with ptosis and ophthalmoplegia who died from cardiomyopathy and cardiac conduction abnormalities; sister with epilepsy who died at 48 | Blood work: lactate, pyruvate normal                                                                              |
| Gardner et al., 2003 <sup>20</sup>   | Mitochondrial cytopathy | M | 22    | 34    | 61 | Psychosis (auditory and visual hallucinations), treatment-resistant depression, suicide attempt                                                                                      | Fatigue, headaches, facial paresthesias, sensorineural hearing loss; excessive sweating; conduction block; DM                  | Maternal aunts: psychiatric symptoms; sister: depression; father: schizophrenia                                                                                                                                                 | SPECT : decreased rCBF; Muscle biopsy: no RRFs                                                                    |
| Grover et al., 2006 <sup>45</sup>    | Mitochondrial myopathy  | M | 16    | 16    | 16 | Mania followed by catatonia; deterioration on psychotropic medications                                                                                                               | Muscle rigidity and weakness                                                                                                   | Paternal uncle: psychotic illness                                                                                                                                                                                               | MRI: hyperintensities of the basal ganglia bilaterally; SPECT: impaired perfusion, right thalamus; Muscle biopsy: |

|                                    |                            |   |       |    |    |                                                                                                                                  |                                                                                                                             |                                    |                                                                                                                                                                                                                          |
|------------------------------------|----------------------------|---|-------|----|----|----------------------------------------------------------------------------------------------------------------------------------|-----------------------------------------------------------------------------------------------------------------------------|------------------------------------|--------------------------------------------------------------------------------------------------------------------------------------------------------------------------------------------------------------------------|
|                                    |                            |   |       |    |    |                                                                                                                                  |                                                                                                                             |                                    | subsarcolemmal accumulations of abnormal mitochondria                                                                                                                                                                    |
| Hopkins et al., 2010 <sup>46</sup> | POLGI mutation (c.1550G>T) | F | 16-21 | 16 | NR | Depression, suicidal ideation, psychosis                                                                                         | DM; adrenal insufficiency; hypothyroidism; short stature; seizures; choreiform movements; encephalopathy                    | TWIN A                             | Blood work: elevated lactate; CT: basal ganglia hyperintensity; MRI: bilateral basal ganglia and thalamic hyperintensities; Muscle biopsy: mild chronic myopathic changes, increased central nuclei, and small myofibers |
| Hopkins et al., 2010 <sup>46</sup> | POLGI mutation (c.1550G>T) | F | 17-22 | 17 | NR | Depression, suicidal ideation, psychosis                                                                                         | DM; adrenal insufficiency; hypothyroidism; short stature; headache; left facial twitching; seizures; encephalopathy         | TWIN B                             | Blood work: elevated lactate; CT: bilateral basal ganglia infarctions, right-frontal infarction                                                                                                                          |
| Inagaki et al., 1997 <sup>21</sup> | MELAS A3243G               | M | 31    | 29 | 35 | Psychosis (auditory hallucinations, persecutory delusions), odd behavior, frontal lobe syndrome, mutism, cognitive deterioration | Short stature, sensorineural hearing loss, WPW, DM                                                                          | Family history DM and hearing loss | MRI : normal<br>SPECT: normal<br>Blood work: lactate and pyruvate elevated<br>Muscle biopsy: no RRFs                                                                                                                     |
| Jaksch et al., 2001 <sup>22</sup>  | MELAS A3274G               | M | 27    | 27 | 33 | Psychosis, depression, suicidal ideation, cognitive deterioration                                                                | Bilateral hearing loss; gait instability; dysdiadochokinesis; vision loss with early-onset cataracts; dysarthria; dysmetria | No history of neurological disease | MRI: cerebral and cerebellar atrophy; hyperintensities in basal ganglia and periventricular white matter;                                                                                                                |

|                                      |                                 |   |    |       |    |                                                                                                              |                                                                                                                     |                                                                                                                    |                                                                                                                                                         |
|--------------------------------------|---------------------------------|---|----|-------|----|--------------------------------------------------------------------------------------------------------------|---------------------------------------------------------------------------------------------------------------------|--------------------------------------------------------------------------------------------------------------------|---------------------------------------------------------------------------------------------------------------------------------------------------------|
|                                      |                                 |   |    |       |    |                                                                                                              |                                                                                                                     |                                                                                                                    | Blood work:<br>lactate elevated;<br>Muscle biopsy:<br>RRFs, COX<br>activity reduced,<br>complex I<br>reduced                                            |
| Kaido et al.,<br>1996 <sup>23</sup>  | MELAS<br>A3243G                 | F | 53 | 53    | 53 | Apathy, psychosis<br>(hallucinations)                                                                        | Recurrent vomiting,<br>anuresis, decreased<br>level of<br>consciousness, short<br>stature, muscle<br>atrophy, ileus | Mother: short<br>stature                                                                                           | Blood work:<br>lactate and<br>pyruvate normal;<br>CSF: lactate and<br>pyruvate<br>elevated; MRI:<br>diffuse cerebral<br>atrophy; Muscle<br>biopsy: RRFs |
| Kiejna et al.,<br>2002 <sup>24</sup> | MELAS                           | M | 32 | 19    | 32 | Psychosis (visual<br>hallucinations, somatic<br>delusions);<br>hyperarousal anxiety,<br>progressive dementia | Headache, stroke-like<br>episodes, chronic<br>tinnitus                                                              | Mother: seizures,<br>episodic loss of<br>consciousness,<br>stroke; brother:<br>unusual<br>neurological<br>episodes | MRI: cortical and<br>subcortical<br>atrophy; Blood<br>work: lactate<br>normal; Visual<br>EVP: latencies in<br>both eyes;<br>Muscle biopsy:<br>RRFs      |
| Koene et al.,<br>2009 <sup>47</sup>  | MTND1<br>mutation<br>(3460 G>A) | F | 14 | Teens | 16 | Recurrent suicidal<br>ideation and major<br>depression, treated<br>with clomipramine                         | Fatigue, migraine,<br>myopathy                                                                                      | Family history of<br>depression                                                                                    | Blood work:<br>elevated lactate                                                                                                                         |
| Koene et al.,<br>2009 <sup>47</sup>  | POLG1<br>mutation<br>(1399G>A)  | F | 16 | Teens | 17 | Major depression with<br>dysphoria, apathy and<br>food aversion, visual<br>hallucinations                    | Migraine, epilepsy,<br>encephalopathy,<br>fulminant hepatic<br>failure, death                                       |                                                                                                                    | Blood work:<br>elevated lactate                                                                                                                         |
| Koene et al.,<br>2009 <sup>47</sup>  | MT DNA Del<br>4977 bp           | F | 12 | Teens | 14 | Major depression                                                                                             | Muscle weakness,<br>migraine, short<br>stature, retinitis<br>pigmentosa, DM,<br>myopathy                            |                                                                                                                    | Blood work:<br>elevated lactate                                                                                                                         |
| Koene et al.<br>2009 <sup>47</sup>   | MTTK<br>mutation<br>(8344A>G)   | F | 15 | 16    | 16 | Major depression,<br>mental retardation                                                                      | Muscle weakness,<br>fatigue                                                                                         | Family history of<br>depression                                                                                    | Blood work:<br>lactate normal                                                                                                                           |

|                                       |                                          |   |       |              |    |                                                                                                              |                                                                                                         |                                                                                                                                                              |                                                                                        |
|---------------------------------------|------------------------------------------|---|-------|--------------|----|--------------------------------------------------------------------------------------------------------------|---------------------------------------------------------------------------------------------------------|--------------------------------------------------------------------------------------------------------------------------------------------------------------|----------------------------------------------------------------------------------------|
| Koller et al., 2003 <sup>25</sup>     | MELAS 3243                               | M | 34    | 22           | 37 | Frontal lobe syndrome with apathy, loss of interest, aggressive behavior, personality change                 | Short stature, hearing loss, migraines, seizures, ataxia, WPW, hypertrophic cardiomyopathy, azoospermia | No neurological or psychiatric history                                                                                                                       | MRI: disseminated WML; Blood work: lactate elevated; Muscle biopsy : RRFs, COX– fibers |
| Komulainen et al., 2010 <sup>48</sup> | POLG mutation (c.2447G>A and c.2243 G>C) | F | Teens | 11           | NR | Learning difficulties and cognitive deterioration, depression, aggressivity, suicidality, psychotic episodes | Epilepsy, ptosis, cardiac arrhythmia                                                                    | Sister: mental retardation, ptosis, psychiatric problems (depression, aggressivity, and suicidality)                                                         | CT: normal                                                                             |
| Lacey et al., 2008 <sup>26</sup>      | MELAS 3243                               | M | 30    | 25           | 30 | OCPD, treatment-resistant OCD                                                                                | Headache, seizures, left homonymous hemianopia, sensorineural deafness, short stature                   | None                                                                                                                                                         | MRI: WML temporal and occipital lobes; Blood work: lactate elevated                    |
| Lacey et al., 2008 <sup>26</sup>      | MELAS 3243                               | M | 49    | 51           | 51 | Treatment-resistant OCD, agitation                                                                           | Stroke-like episodes, seizures, DM, short stature, sensorineural deafness                               | Mother: short stature, sensorineural deafness, congenital heart valve abnormality                                                                            | MRI: moderate atrophy, multiple areas of infarction                                    |
| Mancuso et al., 2008 <sup>49</sup>    | Multiple mtDNA deletions                 | F | 12    | 15           | 63 | Recurrent depression without psychotic features, cognitive impairment                                        | Migraines, exercise intolerance initially diagnosed as fibromyalgia, short stature, muscle atrophy      | Multiple maternal family members with bipolar disorder, depression, schizophrenia, and “nervous breakdowns;” some members with lower-limb motor difficulties | Blood work: elevated lactate; MRI: normal; Muscle biopsy: RRFs and COX– fibers         |
| Miyaoka et al., 1997 <sup>27</sup>    | MELAS A3243G                             | M | 47    | Not reported | 52 | Recurrent depression                                                                                         | DM                                                                                                      | Not reported                                                                                                                                                 | MRI: normal; SPECT: hypoaccumulation bilateral                                         |

|                                                                                 |                                          |   |    |              |    |                                                                                                                                                                           |                                                                                                                       |                                                                                                                               |                                                                                                                                                         |
|---------------------------------------------------------------------------------|------------------------------------------|---|----|--------------|----|---------------------------------------------------------------------------------------------------------------------------------------------------------------------------|-----------------------------------------------------------------------------------------------------------------------|-------------------------------------------------------------------------------------------------------------------------------|---------------------------------------------------------------------------------------------------------------------------------------------------------|
|                                                                                 |                                          |   |    |              |    |                                                                                                                                                                           |                                                                                                                       |                                                                                                                               | parieto-occipital areas                                                                                                                                 |
| Miyaoka et al., 1997 <sup>27</sup>                                              | MELAS A3243G                             | F | 37 | Not reported | 62 | Panic disorder with agoraphobia                                                                                                                                           | DM                                                                                                                    | Not reported                                                                                                                  | MRI: normal; SPECT: hypoaccumulation right occipital area                                                                                               |
| Miyaoka et al., 1997 <sup>27</sup>                                              | MELAS A3243G                             | F | 25 | NR           | 69 | Social phobia                                                                                                                                                             | DM                                                                                                                    | Not reported                                                                                                                  | MRI: WML; SPECT: normal                                                                                                                                 |
| Miyaoka et al., 1997 <sup>27</sup>                                              | MELAS A3243G                             | M | 35 | NR           | 61 | Phobias                                                                                                                                                                   | DM, transient atonic bladder                                                                                          | Not reported                                                                                                                  | MRI: WML; SPECT: hypoaccumulation bilateral occipital areas                                                                                             |
| Odawara et al., 1997 <sup>30</sup>                                              | MELAS                                    | F | 23 | 21           | 52 | Treatment-resistant schizophrenia; progressive dementia                                                                                                                   | Muscle wasting, DM, episodes of LOC, bilateral sensorineural hearing loss                                             | Mother: schizophrenia; Maternal uncle: schizophrenia                                                                          | Muscle biopsy: RRFs                                                                                                                                     |
| Onishi et al., 1997 <sup>31</sup>                                               | MELAS A3243G                             | M | 22 | NR           | 23 | Treatment-resistant depression, anxiety                                                                                                                                   | Fatigue, sensorineural hearing loss, WPW                                                                              | Mother, maternal grandmother - DM                                                                                             | MRI :normal SPECT: decreased rCBF                                                                                                                       |
| Prayson and Wang, 1998 <sup>32</sup>                                            | MELAS 3243                               | F | 27 | 27           | 47 | Paranoid schizophrenia                                                                                                                                                    | Peptic ulcer disease, malnutrition, seizure, constipation requiring hemicolectomy, migraines, deafness, stroke        | Not reported                                                                                                                  | MRI: bilateral calcification, basal ganglia; left temporal lobe infarction; Blood work: lactate and pyruvate elevated; Muscle biopsy: RRFs, COX- fibers |
| Rantamaki et al., 2001 <sup>51</sup> and Van Goethem et al., 2004 <sup>50</sup> | POLG mutation (c.2243G>C and c.3428A>G)) | M | 30 | 30           | 47 | Fatigue, social withdrawal, lack of concentration considered to reflect mental illness; treated with antipsychotics that worsened his difficulty with movement, cognitive | Ataxia, dysarthria, nystagmus, ophthalmoplegia, hyperreflexia, decreased vibration sense, muscle weakness and atrophy | Cousin: severe psychiatric symptoms and alcoholism; died at 42; possibly of a seizure; 2 sisters with ataxia, 1 with epilepsy | NR                                                                                                                                                      |

|                                        |                          |   |       |    |    |                                                                                                 |                                                                                     |                                                                                                                                                                                                             |                                                                                                     |
|----------------------------------------|--------------------------|---|-------|----|----|-------------------------------------------------------------------------------------------------|-------------------------------------------------------------------------------------|-------------------------------------------------------------------------------------------------------------------------------------------------------------------------------------------------------------|-----------------------------------------------------------------------------------------------------|
|                                        |                          |   |       |    |    | impairment                                                                                      |                                                                                     |                                                                                                                                                                                                             |                                                                                                     |
| Sartor et al., 2002 <sup>34</sup>      | MELAS A3243G             | M | 28    | 28 | 34 | Acute psychosis, psychomotor slowing, social withdrawal and odd behavior, frontal lobe syndrome | TIA, headache, ataxia, seizures                                                     | None reported                                                                                                                                                                                               | MRI: atrophy, cortical and subcortical lesions; Blood work: lactate elevated; Muscle biopsy: RRFs   |
| Shinkai et al., 2000 <sup>36</sup>     | MELAS 3243               | F | 48    | 30 | 48 | Psychosis (paranoid ideation), aggression, cognitive deterioration                              | Hearing loss, DM, small stature, stroke-like episode                                | Hearing loss in mother, younger sister, father                                                                                                                                                              | MRI: hyperintensities of the temporo-parietal lobes bilaterally and bilateral caudate calcification |
| Siciliano et al., 2003 <sup>52</sup>   | ANT1 mutation (c.293T>C) | F | Teens | 40 | 44 | Bipolar disorder with frequent psychotic episodes and little response to lithium                | Ptosis, bilateral facial weakness, migraines                                        | Sister: bipolar disorder, exercise intolerance; Sister: facial weakness, ataxia, bipolar disorder; Mother: ptosis, cognitive impairment, migraines, bipolar disorder, ataxia, hearing loss, ophthalmoplegia | Blood work: lactate normal; Muscle biopsy: RRF and COX-fibers                                       |
| Spellberg et al., 2001 <sup>37</sup>   | MELAS A3243G             | M | 21    | 21 | 36 | Psychosis                                                                                       | Seizures, sensorineural hearing loss, wide-based gait, weakness, intention tremor   | Multiple siblings and maternal family members: DM, heart disease, psychiatric problems (bipolar disorder and psychosis), hearing loss                                                                       | Blood work: lactate normal; Muscle biopsy: no RRFs                                                  |
| Stewart and Naylor, 1990 <sup>38</sup> | KSS                      | F | 23    | 20 | 44 | Bipolar disorder, cognitive deterioration                                                       | Myasthenia, bilateral ptosis, ophthalmoplegia, proximal muscle weakness, cerebellar | None                                                                                                                                                                                                        | CT : normal; Blood work: lactate elevated; Muscle biopsy: RRFs                                      |



|                                                                                                               |                                          |   |    |    |             |                                                                                                                                                                                     |                                                                                                                                                                                                  |                                                                                                              |                                                                                                      |
|---------------------------------------------------------------------------------------------------------------|------------------------------------------|---|----|----|-------------|-------------------------------------------------------------------------------------------------------------------------------------------------------------------------------------|--------------------------------------------------------------------------------------------------------------------------------------------------------------------------------------------------|--------------------------------------------------------------------------------------------------------------|------------------------------------------------------------------------------------------------------|
|                                                                                                               |                                          |   |    |    |             |                                                                                                                                                                                     | ataxia, pigmentary retinopathy, heart block                                                                                                                                                      |                                                                                                              |                                                                                                      |
| Suomalainen et al., 1992 <sup>39</sup>                                                                        | Autosomal dominant PEO, Twinkle mutation | F | 19 | 29 | 29          | Recurrent depression with severe psychomotor retardation, apathy, mutism, fatigue, insomnia, negativism, loss of initiative and appetite; at age 60: psychosis (paranoid delusions) | Bilateral ptosis, ophthalmoplegia, muscle weakness and atrophy, short stature, amenorrhea, cardiac arrhythmias                                                                                   | Mother: progressive ptosis; 4 siblings: PEO and muscle weakness; Brother: arrhythmias                        | Blood work: lactate elevated; Muscle biopsy: RRFs                                                    |
| Suzuki et al., 1989 <sup>40</sup><br>Suzuki et al., 1990 <sup>41</sup><br>Mizukami et al., 1992 <sup>28</sup> | MELAS                                    | M | 25 | 19 | 35          | Psychosis, psychomotor excitement, impulsive behavior with progressive cognitive deterioration, and akinetic mutism                                                                 | Short stature, muscle atrophy, disturbances of consciousness, dysarthria, myoclonus, short stature, paralytic ileus, hypertrophic cardiomyopathy, bilateral sensorineural hearing loss, seizures | Not reported                                                                                                 | MRI :WML left parieto-occipital area; Blood work: lactate and pyruvate elevated; Muscle biopsy: RRFs |
| Sweeney et al., 1993 <sup>42</sup>                                                                            | MELAS 3251                               | F | 29 | NR | After death | Psychotic depression                                                                                                                                                                | Neck muscle weakness; died at 36                                                                                                                                                                 | Multiple family members with progressive myopathy with weakness of neck and respiratory muscles; early death | Not reported                                                                                         |
| Sweeney et al., 1993 <sup>42</sup>                                                                            | MELAS 3251                               | F | 25 | 20 | 39          | Anorexia and agoraphobia                                                                                                                                                            | Muscle weakness of neck and arms, diplopia, external ophthalmoplegia, idiopathic thrombocytopenia                                                                                                | As above (sisters)                                                                                           | CT: normal; Muscle biopsy: RRFs                                                                      |
| Thomeer et al., 1998 <sup>43</sup>                                                                            | MELAS A3243G                             | F | 22 | 14 | 27          | Treatment-resistant psychosis; aggression, suicidal behavior,                                                                                                                       | Short stature, headaches, confusional state;                                                                                                                                                     | No history of neurological or psychiatric illness                                                            | CT: hypodensity left temporo-occipital area;                                                         |

|                                        |                                 |   |    |    |    |                                                                                                                                                                                   |                                                                                                                                                                                                                          |                                                                                                                                                 |                                                                                                       |
|----------------------------------------|---------------------------------|---|----|----|----|-----------------------------------------------------------------------------------------------------------------------------------------------------------------------------------|--------------------------------------------------------------------------------------------------------------------------------------------------------------------------------------------------------------------------|-------------------------------------------------------------------------------------------------------------------------------------------------|-------------------------------------------------------------------------------------------------------|
|                                        |                                 |   |    |    |    | cognitive deterioration                                                                                                                                                           | aphasia and apraxia, WPW, deafness, seizures; died suddenly at 31 secondary to heart failure                                                                                                                             |                                                                                                                                                 | Blood work: lactate elevated; Muscle biopsy: RRFs                                                     |
| Van Goethem et al., 2004 <sup>50</sup> | POLG mutation (c.1399G>A)       | M | 23 | 18 | 39 | Acute psychiatric illness                                                                                                                                                         | Epilepsy; Todd paralysis, left arm and face; intestinal pseudo-obstruction, anorexia, gait and limb ataxia, areflexia, generalized dystrophy, loss of vibration sense, dysarthria, left-sided Babinski, positive Romberg | Sister: acute encephalopathy; myoclonus; seizures, left hemianopsia; cortical blindness; stupor and sudden death                                | CSF: lactate normal; Blood work: lactate elevated; MRI: normal; SPECT: normal; Muscle biopsy: no RRFs |
| Verhoeven et al., 2011 <sup>53</sup>   | Novel POLG mutation (c.2207A>G) | F | 37 | 35 | 52 | Recurrent episodes of depression with melancholic features, one episode of major depression with paranoid ideation, resistant to treatment with multiple psychotropic medications | Ataxia, cataracts, dysarthria, cardiomyopathy, fatigue, incomplete left bundle branch block, all cerebellar tests impaired, hyperreflexia with bilateral positive Hoffman and Babinski signs, positive snout reflex      | Brother died in 50s of gastric hemorrhage; son mentally retarded; mother died at 55 of cardiac arrest; father died at 80 of cerebral hemorrhage | CT: moderate cerebellar atrophy; MRI: marked cerebellar atrophy                                       |
| Yamazaki et al., 1991 <sup>44</sup>    | MELAS                           | M | 29 | 19 | 37 | Psychosis with diagnoses of schizophrenia and dementia, NMS during Haldol treatment                                                                                               | Muscle weakness and atrophy                                                                                                                                                                                              | Not reported                                                                                                                                    | Muscle biopsy: RRFs, COX <sup>-</sup> fibers                                                          |
| Young et al., 2010 <sup>54</sup>       | Novel MTF mutation (m.586G>A)   | F | 57 | 45 | NR | Referred to psychiatry for self-neglect, weight loss, cognitive deterioration, psychosis (paranoid delusions and auditory hallucinations)                                         | Deafness, worsening mobility with falls, facial grimacing, dysarthria, ataxia, hyperreflexia, positive Babinski responses                                                                                                | Father died of multiple strokes; Mother died of metastatic breast cancer                                                                        | Blood work: lactate normal; MRI: generalized cerebral, cerebellar, and brainstem atrophy              |

NR: not reported; CAD: coronary artery disease; COX: cytochrome oxidase; CT: computed tomography; DM: diabetes mellitus; KSS: Kearns-Sayre syndrome; LOC: loss of consciousness; MELAS: mitochondrial encephalomyopathy with lactic acidosis and stroke-like episodes; MRI: magnetic resonance imaging; OCD: obsessive-compulsive disorder; PEO: progressive external ophthalmoplegia; RRFs: ragged red fibers; SPECT: single photon emission computed tomography; TIA: transient ischemic attack; WML: white-matter lesions; WPW: Wolff-Parkinson-White syndrome.
